# Supplementary material for: P2Y2 Receptor Induces L. amazonensis Infection Control in a Mechanism Dependent on Caspase-1 Activation and IL-1β Secretion
Source: Hindawi journal article supplement (doi:10.1155/2020/2545682), 2020-09-30

**A**

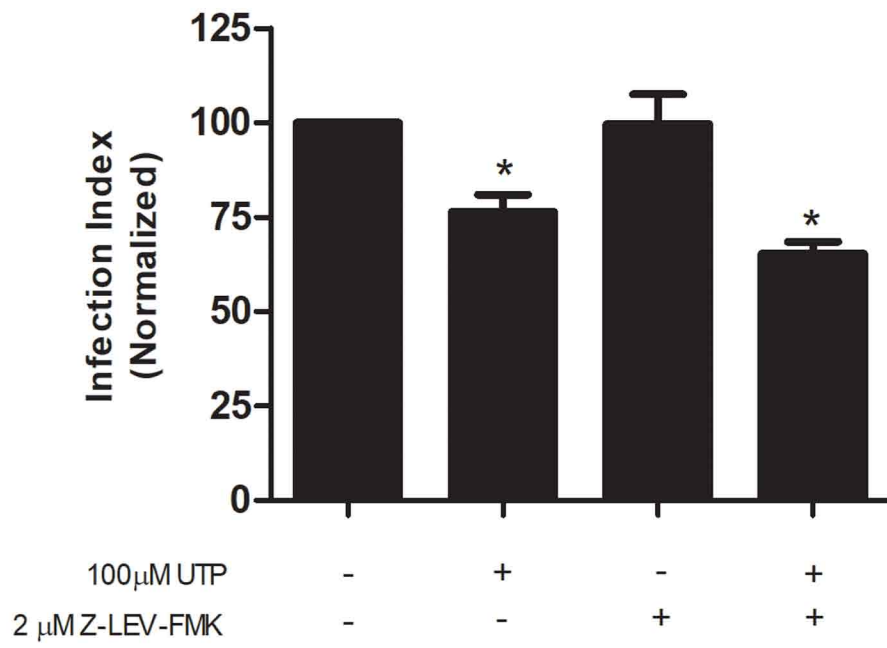

**B**

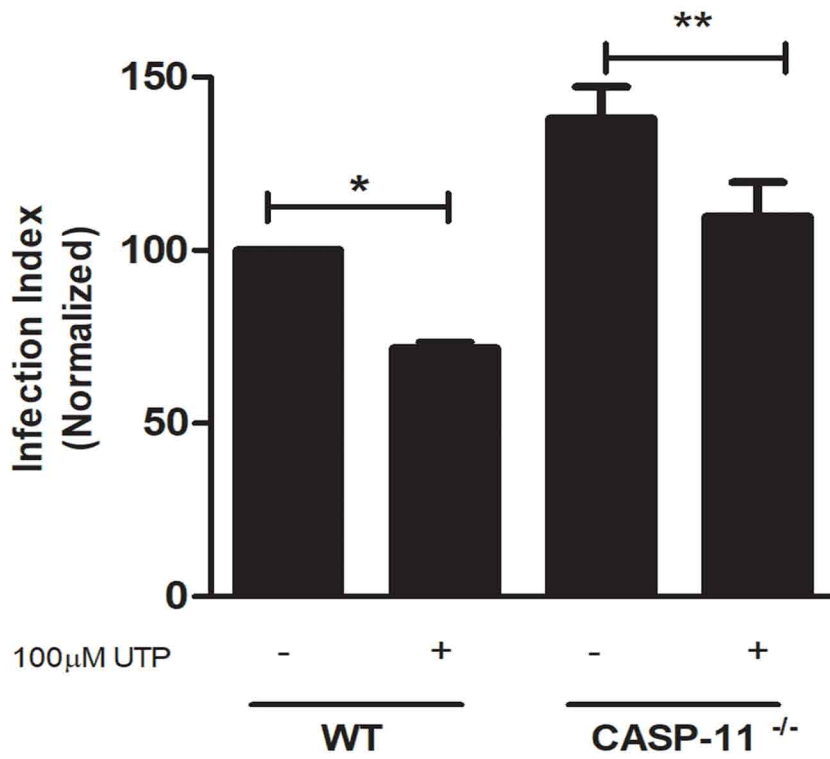

Supplement: f1 [file 2545682.f1.pdf]
